# Supplementary material for: Application of Leather Waste Fractions and Their Biochars as Organic Fertilisers for Ryegrass Growth: Agri-Environmental Aspects and Plants Response Modelling
Source: MDPI journal article supplement (doi:10.3390/en16093883), 2023-05-04
Supplement: s1 [file s1]

**Table S1. Chemical composition of selected waste fractions and processed waste fractions for fertilisers**

[illegible]
